# Supplementary material
Source: PubMed Central journal article supplement (PMC4755330)
Supplement: NIHMS752479-supplement-1.pdf [file NIHMS752479-supplement-1.pdf]

## **SUPPLEMENTAL MATERIAL**

**Supplemental Table 1.** Baseline Characteristics of the Study Population After Application of Inverse Probability Weights

**Supplemental Table 2.** Medication Adherence Within 90 Days of Discharge Among Patients with Medicare Part D Coverage

**Supplemental Table 1.** Baseline Characteristics of the Study Population After Application of Inverse Probability Weights

| Characteristic                                                    | Black Patients               |               |         |                                      | Patients of Other Races      |               |         |                                      |
|-------------------------------------------------------------------|------------------------------|---------------|---------|--------------------------------------|------------------------------|---------------|---------|--------------------------------------|
|                                                                   | H-ISDN at Discharge, No. (%) |               | P Value | Standardized Difference <sup>a</sup> | H-ISDN at Discharge, No. (%) |               | P Value | Standardized Difference <sup>a</sup> |
|                                                                   | Yes (n = 316)                | No (n = 1076) |         |                                      | Yes (n = 595)                | No (n = 2676) |         |                                      |
| Age, mean (SD), y                                                 | 75.9 (7.9)                   | 75.7 (8.1)    | .80     | .02                                  | 80.2 (7.8)                   | 80.1 (7.9)    | .69     | .02                                  |
| Age group, No. (%)                                                |                              |               | .60     | .03                                  |                              |               | .99     | .001                                 |
| 65-79 y                                                           | 225 (70.7)                   | 745 (69.2)    |         |                                      | 270 (45.3)                   | 1214 (45.3)   |         |                                      |
| ≥ 80 y                                                            | 93 (29.3)                    | 332 (30.8)    |         |                                      | 327 (54.7)                   | 1463 (54.7)   |         |                                      |
| Women, No. (%)                                                    | 158 (49.6)                   | 517 (48.1)    | .62     | .03                                  | 221 (37.0)                   | 971 (36.3)    | .75     | .02                                  |
| Medical history, No. (%)                                          |                              |               |         |                                      |                              |               |         |                                      |
| Anemia                                                            | 48 (15.0)                    | 160 (14.9)    | .96     | .004                                 | 114 (19.0)                   | 493 (18.4)    | .74     | .02                                  |
| Atrial fibrillation/ flutter                                      | 75 (23.7)                    | 245 (22.7)    | .72     | .02                                  | 256 (42.8)                   | 1141 (42.6)   | .92     | .004                                 |
| Cerebrovascular accident or TIA                                   | 60 (18.8)                    | 196 (18.2)    | .79     | .02                                  | 90 (15.1)                    | 435 (16.3)    | .48     | .03                                  |
| COPD                                                              | 80 (25.3)                    | 285 (26.5)    | .66     | .03                                  | 163 (27.2)                   | 751 (28.1)    | .67     | .02                                  |
| Depression                                                        | 15 (4.6)                     | 53 (5.0)      | .79     | .02                                  | 57 (9.5)                     | 249 (9.3)     | .89     | .01                                  |
| Diabetes mellitus                                                 | 130 (40.8)                   | 448 (41.6)    | .82     | .02                                  | 243 (40.7)                   | 1026 (38.3)   | .33     | .05                                  |
| Hyperlipidemia                                                    | 131 (41.2)                   | 455 (42.3)    | .73     | .02                                  | 304 (50.9)                   | 1381 (51.6)   | .75     | .01                                  |
| Hypertension                                                      | 260 (81.9)                   | 897 (83.3)    | .56     | .04                                  | 396 (66.3)                   | 1826 (68.2)   | .37     | .04                                  |
| Implantable cardioverter-defibrillator                            | 63 (19.8)                    | 217 (20.1)    | .91     | .008                                 | 132 (22.1)                   | 582 (21.8)    | .85     | .01                                  |
| Heart failure with ischemic etiology                              | 152 (47.8)                   | 532 (49.4)    | .61     | .03                                  | 431 (72.1)                   | 1932 (72.2)   | .98     | .001                                 |
| Pacemaker                                                         | 38 (11.8)                    | 133 (12.3)    | .81     | .02                                  | 112 (18.8)                   | 539 (20.2)    | .46     | .03                                  |
| Peripheral vascular disease                                       | 35 (11.0)                    | 116 (10.7)    | .90     | .01                                  | 101 (16.9)                   | 436 (16.3)    | .72     | .02                                  |
| Renal insufficiency                                               | 58 (18.3)                    | 203 (18.8)    | .83     | .01                                  | 170 (28.5)                   | 769 (28.7)    | .91     | .01                                  |
| Smoking in the previous year                                      | 55 (17.4)                    | 191 (17.7)    | .90     | .01                                  | 59 (9.8)                     | 262 (9.8)     | .97     | .002                                 |
| No. of all-cause hospital admissions in the prior year, mean (SD) | 1.4 (1.8)                    | 1.4 (1.9)     | .85     | .01                                  | 1.4 (1.8)                    | 1.4 (1.6)     | .46     | .03                                  |
| Claims-based history at admission, No. (%)                        |                              |               |         |                                      |                              |               |         |                                      |
| Chronic liver disease                                             | 6 (1.8)                      | 16 (1.5)      | .71     | .02                                  | 4 (0.6)                      | 19 (0.7)      | .83     | .01                                  |
| Dementia                                                          | 26 (8.2)                     | 80 (7.4)      | .63     | .03                                  | 35 (5.9)                     | 170 (6.3)     | .70     | .02                                  |
| Disability                                                        | 11 (3.4)                     | 34 (3.1)      | .82     | .01                                  | 8 (1.3)                      | 43 (1.6)      | .63     | .02                                  |
| Malnutrition                                                      | 12 (3.9)                     | 33 (3.1)      | .48     | .04                                  | 25 (4.1)                     | 128 (4.8)     | .48     | .03                                  |
| Psychiatric disorder                                              | 3 (0.8)                      | 9 (0.9)       | .93     | .01                                  | 3 (0.6)                      | 22 (0.8)      | .48     | .03                                  |
| Vital signs at admission                                          |                              |               |         |                                      |                              |               |         |                                      |
| Heart rate, mean (SD), beats/min                                  | 87.9 (21.1)                  | 88.0 (20.0)   | .95     | .004                                 | 84.1 (19.9)                  | 84.9 (20.1)   | .38     | .04                                  |
| Heart rate, No. (%)                                               |                              |               | .85     | .04                                  |                              |               | .68     | .04                                  |
| < 80 beats/min                                                    | 107 (33.7)                   | 373 (34.6)    |         |                                      | 268 (44.9)                   | 1184 (44.2)   |         |                                      |

|                                                  |             |              |       |      |             |             |        |      |
|--------------------------------------------------|-------------|--------------|-------|------|-------------|-------------|--------|------|
| 80-100 beats/min                                 | 131 (41.2)  | 450 (41.8)   |       |      | 223 (37.4)  | 975 (36.4)  |        |      |
| > 100 beats/min                                  | 80 (25.1)   | 254 (23.6)   |       |      | 106 (17.8)  | 517 (19.3)  |        |      |
| Respiratory rate, No. (%)                        |             |              | .81   | .02  |             |             | .75    | .02  |
| < 30 breaths/min                                 | 298 (93.7)  | 1,013 (94.1) |       |      | 564 (94.4)  | 2518 (94.1) |        |      |
| ≥ 30 breaths/min                                 | 20 (6.3)    | 64 (5.9)     |       |      | 33 (5.6)    | 159 (5.9)   |        |      |
| Systolic blood pressure, mean (SD), mm Hg        | 143 (29.5)  | 142 (29.9)   | .71   | .02  | 132 (26.8)  | 129 (26.1)  | .03    | .10  |
| Systolic blood pressure, No. (%)                 |             |              | .63   | .06  |             |             | .97    | .01  |
| < 110 mm Hg                                      | 35 (11.0)   | 136 (12.6)   |       |      | 131 (21.9)  | 599 (22.4)  |        |      |
| 110-150 mm Hg                                    | 174 (54.8)  | 562 (52.2)   |       |      | 349 (58.4)  | 1555 (58.1) |        |      |
| > 150 mm Hg                                      | 109 (34.2)  | 379 (35.2)   |       |      | 118 (19.7)  | 523 (19.5)  |        |      |
| Tests at admission                               |             |              |       |      |             |             |        |      |
| Left ventricular ejection fraction, mean (SD), % | 24.4 (7.4)  | 24.5 (7.8)   | .85   | .01  | 26.5 (6.7)  | 26.4 (7.3)  | .82    | .01  |
| Serum creatinine, mean (SD), mg/dL               | 1.6 (0.9)   | 1.8 (7.3)    | .58   | .04  | 1.8 (1.1)   | 1.8 (1.2)   | .75    | .01  |
| Serum creatinine, No. (%)                        |             |              |       |      |             |             |        |      |
| < 1.5 mg/dL                                      | 184 (57.8)  | 623 (57.9)   | > .99 | .004 | 262 (43.9)  | 1142 (42.7) | .80    | .03  |
| 1.5-2.0 mg/dL                                    | 85 (26.8)   | 287 (26.6)   |       |      | 174 (29.2)  | 816 (30.5)  |        |      |
| > 2.0 mg/dL                                      | 49 (15.4)   | 167 (15.5)   |       |      | 161 (26.9)  | 718 (26.8)  |        |      |
| Serum urea nitrogen, mg/dL                       | 27.3 (15.8) | 26.9 (16.4)  | .71   | .02  | 36.3 (20.6) | 36.3 (19.9) | .98    | .001 |
| Serum urea nitrogen, No. (%)                     |             |              |       |      |             |             |        |      |
| < 20 mg/dL                                       | 111 (35.0)  | 384 (35.7)   | .96   | .02  | 106 (17.7)  | 416 (15.5)  | .43    | .06  |
| 20-50 mg/dL                                      | 182 (57.4)  | 608 (56.4)   |       |      | 380 (63.6)  | 1748 (65.3) |        |      |
| > 50 mg/dL                                       | 24 (7.6)    | 85 (7.9)     |       |      | 112 (18.7)  | 513 (19.2)  |        |      |
| Medications at discharge, No. (%)                |             |              |       |      |             |             |        |      |
| ACE inhibitor                                    | 179 (56.3)  | 686 (63.7)   | .02   | .15  | ---         | ---         | ---    | ---  |
| ARB                                              | 48 (15.3)   | 158 (14.7)   | .80   | .02  | ---         | ---         | ---    | ---  |
| ACE inhibitor and/or ARB                         | 222 (69.9)  | 830 (77.1)   | .01   | .16  | ---         | ---         | ---    | ---  |
| Aldosterone antagonist                           | 85 (26.8)   | 240 (22.3)   | .09   | .11  | 123 (20.5)  | 539 (20.2)  | .44    | .01  |
| β-Blocker                                        | 280 (88.3)  | 933 (86.6)   | .45   | .05  | 498 (83.4)  | 2101 (78.5) | .01    | .12  |
| Digoxin                                          | 69 (21.7)   | 199 (18.5)   | .21   | .08  | 154 (25.8)  | 645 (24.1)  | .39    | .04  |
| Diuretic                                         | 169 (53.1)  | 664 (61.7)   | .006  | .17  | 318 (53.3)  | 1688 (63.1) | < .001 | .20  |

Abbreviations: ACE, angiotensin-converting enzyme; ARB, angiotensin II receptor blocker; COPD, chronic obstructive pulmonary disease; H-ISDN, hydralazine-isosorbide dinitrate; TIA, transient ischemic attack.

SI conversion factors: To convert creatinine from mg/dL to μmol/L, multiply by 88.4; and to convert urea nitrogen from mg/dL to mmol/L, multiply by 0.357.

a Calculated as the difference in means or proportions divided by a pooled estimate of the SD. A standardized difference greater than 0.1 is typically considered meaningful.

b In accordance with the privacy policy of the Centers for Medicare & Medicaid Services, data for cells containing 10 or fewer observations and data for cells that would allow for calculation of cells containing 10 or fewer observations are not reported.

**Supplemental Table 2.** Medication Adherence Within 90 Days of Discharge Among Patients with Medicare Part D Coverage

| Patients                                                                                                                        | Hydralazine-Nitrate | Mineralocorticoid Receptor Antagonist (Positive Control) |
|---------------------------------------------------------------------------------------------------------------------------------|---------------------|----------------------------------------------------------|
| Part D patients who filled an outpatient prescription within 90 days (irrespective of whether discharged on the drug) , No. (%) | 161/4935 (3)        | 876/4935 (18)                                            |
| Part D patients who filled an outpatient prescription among those who were discharged from the hospital on the drug, No. (%)    |                     |                                                          |
| Overall                                                                                                                         | 161/353 (46)        | 876/1162 (75)                                            |
| Black patients                                                                                                                  | 69/161 (43)         | 107/146 (73)                                             |
| Patients of other races                                                                                                         | 92/192 (48)         | 769/1016 (76)                                            |
